# Supplementary material for: Genetic Modulation of HPV Infection and Cervical Lesions: Role of Oxidative Stress-Related Genes
Source: MDPI journal article supplement (doi:10.3390/antiox12101806), 2023-09-27
Supplement: s1 [file s1]

Lisboa, I.P.O.F.G., 1992, Julho 02

Exm<sup>a</sup>. Senhora  
Dr<sup>a</sup>. Isabel Cabral  
Responsável pela Unidade de  
Ginecologia

Dir/126/92

Tenho o prazer de a informar que o ensaio "Polimorfismo de acetilação hepática de neoplasias do endométrio e do ovário para determinação da predisposição genética", pode iniciar-se.

Junto cópia dos pareceres das Comissões Científica e de Ética que justificam esta decisão.

O DIRECTOR DO CENTRO

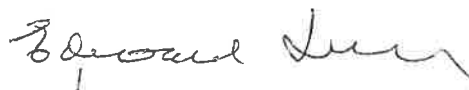

DOUTOR EDWARD LIMBERT

Em anexo: Modelo de Consentimento Informado a utilizar.

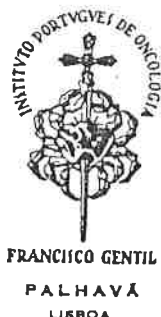

Lisboa, 14 de Abril de 1992.

Ex.mo Senhor Director do  
Instituto Português de Oncologia,  
Centro de Lisboa.

Os membros da Comissão Científica não vêem inconveniente para o Instituto na aderência ao estudo dos "Polimorfismos de Acetilação hepática de neoplasias malignas do endométrio e do ovário para determinação da predisposição genética", proposto pela Dra. Isabel Cabral..

O Presidente da Comissão Científica,

(Professor J. Carmo Pereira)

P A R E C E R

Ref<sup>a</sup> - Polimorfismo de Acetilação hepática de neoplasias malignas do endométrio e do ovário para determinação da predisposição genética.

Protocolo apresentado pela Dr<sup>a</sup> Isabel Cabral

Parecer do Sr.Prof.José Conde:

"Considerando o parecer favorável da Comissão Científica, relativamente a este Protocolo, na forma sucinta como está apresentado pela Dr<sup>a</sup> Isabel Cabral, a Comissão de Ética nada tem a opôr.

Recomenda-se que cada doente autorize, nos termos do Consentimento Informado - Tratamento.

Junto alguns exemplares deste Modelo, já que ainda não se encontra distribuído o Modelo aprovado pela Direcção".

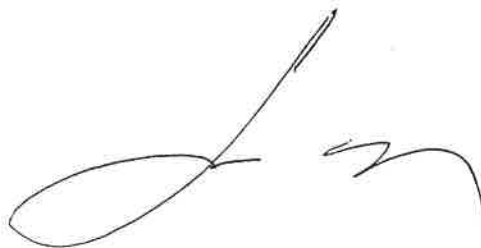A handwritten signature in black ink, appearing to be 'J. Conde', is written below the text. The signature is fluid and cursive, with a large loop for the 'J' and a stylized 'C' for 'Conde'.

Nome ----- Data -----

Data Nascimento ----- Raça ----- Altura ----- Peso ----- Processo -----

#### CARACTERISTICAS FAMILIARES

T. Vulva ----- T. Colo ----- T. Endométrio ----- T. Ovário ----- Outros Tumores -----

#### CARACTERISTICAS CLÍNICAS

HTA ----- Diabetes Melletos ----- Obsidade ----- Hirsutismo ----- Menarca ----- Ciclos -----

I. A. S. ----- Nº parceiros ----- Ag. infecciosos ----- I.O. ----- Menorrag. -----

Metrorragias ----- Coitorragias ----- Terap. hormonal ----- Duração ----- Menopausa -----

Metrorragias pos-menopausa -----

#### DIAGNÓSTICO

Colpocitologia ----- Colposcopia -----

HPV ----- Tipagem ----- Outros Ag. infecciosos -----

Histeroscopia ----- Histerometria ----- Biópsia -----

D.H. Vagina ----- Grau Diferenciação -----

D.H. Colo ----- Grau Diferenciação -----

D.H. Endocolo ----- Grau Diferenciação -----

D.H. Endométrio ----- Grau Diferenciação -----

Citometria de Fluxo -----

Acetilação -----

#### TERAPEUTICA

Conização ----- Laser ----- Curieterapia ----- Rad. Externa ----- Quimioterapia -----

Hist. Total + AB ----- Hist. + AB ----- Hist. R. + Celulect. P. ----- Hist.T. + AB + A.

+ Omentect. ----- Citologia perit. ----- Biópsias ----- Vulvectomia simples -----

Vulvectomia radical + Celulectomia -----

#### RESULTADO

Classificação do Estadiamento do Tumor  
(FIGO)

T1 -----

No -----

Mo -----

ESQUEMA DUMA PROTOCOLO TERAPEUTICO

No essencial, são estes os parâmetros a integrar:

1. Fundamentos científicos do Protocolo terapêutico
2. Finalidades
3. Selecção dos doentes (como e quantos)
4. Diagrama do Protocolo
5. Programas Terapêuticos
6. Acções relativas a eventual toxicidade
7. Dados clínicos e laboratoriais necessários
8. Critérios para avaliar a acção terapêutica
9. Considerações estatísticas
10. Consentimento informado
11. Modelo para registo de dados
12. Bibliografia
13. Quem orienta, colaboradores e meios de comunicação

À

Comissão de Investigação do Instituto Português de  
Oncologia Dr. Francisco Gentil ( Lisboa )

Lisboa 24/X/97

Venho por este meio informar que se encontra ainda em elaboração um projecto de estudo no serviço de Ginecologia deste Instituto, em colaboração com um Serviço do exterior - Laboratório de Genética da FML com o título **"Estudo Genético de Factores de Predisposição para o Desenvolvimento e Progressão dos Cancros do Ovário e Endométrio"**, baseado na Metodologia observacional em casos e controlos, simultaneamente transversal e longitudinal. Acresce que faço parte deste projecto e que este foi sujeito a concurso instituído pela Liga Portuguesa contra o Cancro em 1993, não tendo sido na altura financiado.

Com os melhores cumprimentos, ao dispor,

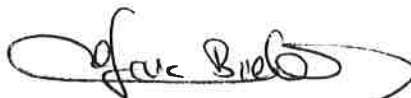

Dr. Maria Clara Bicho
