# Supplementary material for: Genetic Modulation of HPV Infection and Cervical Lesions: Role of Oxidative Stress-Related Genes
Source: MDPI journal article supplement (doi:10.3390/antiox12101806), 2023-09-27
Supplement: s1 [file s1]

**Supplementary Table S1.** Comparison of genotypes distribution – HSIL&ICC *vs* Control.

| Gene        |       | HSIL&ICC      | CONTROLS       | p-value <sup>a</sup> | OR<br>[CI]             |
|-------------|-------|---------------|----------------|----------------------|------------------------|
|             |       | N<br>(%)      | N<br>(%)       |                      |                        |
| <i>ACE1</i> | ID&II | 23<br>(35.4%) | 209<br>(54.3%) | <b>0.005</b>         | 0.461<br>[0.267-0.797] |
|             | DD    | 42<br>(64.6%) | 176<br>(45.7%) |                      |                        |

<sup>a</sup> Chi-square test
